# Supplementary material for: Anti-CRISPR-based biosensors in the yeast S. cerevisiae
Source: PubMed Central journal article supplement (PMC6090965; doi:10.1186/s13036-018-0101-z), 2018-08-01
Supplement: 13036_2018_101_MOESM1_ESM.pdf [file 13036_2018_101_MOESM1_ESM.pdf]

Anti-CRISPR–based biosensors in the yeast *S. cerevisiae*  
**Supplementary Material**

Jing Li<sup>1§</sup>, Zengliang Xu<sup>1§</sup>, Aleksandr Chupalov<sup>1§</sup>, and Mario Andrea Marchisio<sup>1,\*</sup>

<sup>1</sup>School of Life Science and Technology, Harbin Institute of Technology,

2 Yikuang Street, Nan Gang District, 150080 Harbin, P. R. China

<sup>§</sup> These authors contributed equally to this work

\*corresponding author

email addresses: JL, 920138462@qq.com; ZX, 2734001081@qq.com; AC, biochup@yandex.ru

MAM: marchisio@hit.edu.cn, mamarchisio@yahoo.com

Table S1: Relative fluorescence of the eight NOT gates built in this work. Numerical values of the average OFF/ON ratio—with the corresponding standard deviation,  $\sigma_M$ —associated with the eight NOT gates (see main text Figure 1B) are here given. For each gate, the p-value is calculated via two-sided Welch’s t-test to evaluate if a statistically significant difference exists between the fluorescence levels measured in the presence of glucose (ON state) and galactose (OFF state). NOT gates were evaluated in a variable number of independent experiments (replicates). Since every p-value  $< 0.05$ , every NOT gate appears to discriminate between ON and OFF states properly.

| NOT gate     | Mean OFF/ON ratio | $\sigma_M$ | p-value             | Replicates |
|--------------|-------------------|------------|---------------------|------------|
| RGR          | 0.31              | 0.03       | 0.006               | 3          |
| RGR-Mxi1     | 0.282             | 0.005      | 0.024               | 3          |
| pSNR52i      | 0.36              | 0.06       | 0.011               | 4          |
| pSNR52i-Mxi1 | 0.17              | 0.03       | 0.005               | 4          |
| pSNR52m      | 0.30              | 0.06       | $2.9 \cdot 10^{-5}$ | 4          |
| pSNR52m-Mxi1 | 0.36              | 0.04       | $6.2 \cdot 10^{-4}$ | 4          |
| pRPR1i-Mxi1  | 0.33              | 0.08       | $2.1 \cdot 10^{-4}$ | 6          |
| pRPR1m-Mxi1  | 0.37              | 0.07       | $1.1 \cdot 10^{-4}$ | 5          |

Table S2: Relative fluorescence of the three-gene sub-circuits used for the construction of the anti-CRISPR-based biosensors. For each circuit, the p-value is calculated via two-sided Welch’s t-test to evaluate if a statistically significant difference exists between the mean fluorescence measured in the presence and absence of the dSpCas9-Mxi1:gRNA system.  $\sigma_M$  indicates the standard deviation on each average relative fluorescence level. Every circuit was evaluated in 3 independent experiments.

| Circuit      | Relative fluorescence | $\sigma_M$ | p-value |
|--------------|-----------------------|------------|---------|
| RGR-Mxi1     | 0.13                  | 0.01       | 0.0103  |
| pSNR52i-Mxi1 | 0.25                  | 0.03       | 0.0007  |
| pSNR52m-Mxi1 | 0.36                  | 0.03       | 0.0202  |

| <i>NOT gates</i> | RGR          | RGR-Mxi1     | pSNR52i      | pSNR52i-Mxi1 | pSNR52m      | pSNR52m-Mxi1 | pRPR1i-Mxi1  | pRPR1m-Mxi1  |
|------------------|--------------|--------------|--------------|--------------|--------------|--------------|--------------|--------------|
| RGR              | -            | 0.445        | 0.233        | <b>0.004</b> | 0.984        | 0.089        | 0.544        | 0.141        |
| RGR-Mxi1         | 0.445        | -            | 0.139        | <b>0.007</b> | 0.682        | <b>0.042</b> | 0.030        | 0.069        |
| pSNR52i          | 0.233        | 0.139        | -            | <b>0.007</b> | 0.300        | 0.913        | 0.585        | 0.906        |
| pSNR52i-Mxi1     | <b>0.004</b> | <b>0.007</b> | <b>0.007</b> | -            | <b>0.022</b> | <b>0.001</b> | <b>0.006</b> | <b>0.001</b> |
| pSNR52m          | 0.984        | 0.682        | 0.300        | <b>0.022</b> | -            | 0.194        | 0.608        | 0.225        |
| pSNR52m-Mxi1     | 0.089        | <b>0.042</b> | 0.913        | <b>0.001</b> | 0.194        | -            | 0.454        | 0.981        |
| pRPR1i-Mxi1      | 0.544        | 0.030        | 0.585        | <b>0.006</b> | 0.608        | 0.454        | -            | 0.487        |
| pRPR1m-Mxi1      | 0.141        | 0.069        | 0.906        | <b>0.001</b> | 0.225        | 0.981        | 0.487        | -            |

Figure S1: NOT gate comparison via two-sided Welch's t-test. The eight NOT gates we constructed are analyzed in pairs via two-sided Welch's t-test (p-values are the matrix elements). Statistically significant difference is highlighted in green. pSNR52i-Mxi1 shows statistically significant difference with respect to any other configuration. Moreover, RGR-Mxi1 and pSNR52m-Mxi1 are statistically different in a significant way too.

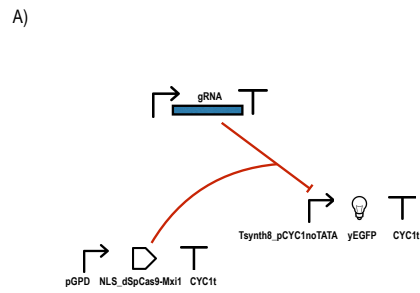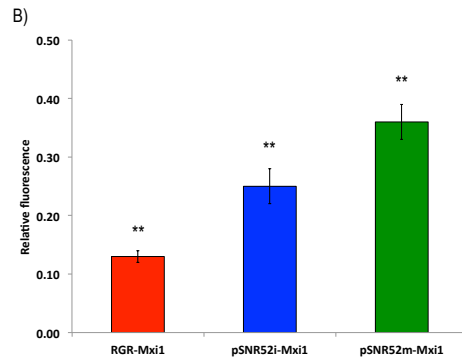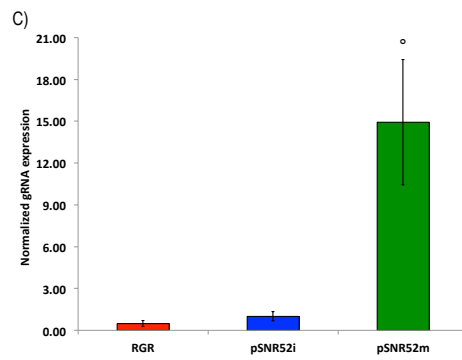

Figure S2: Three-gene circuits for the construction of anti-CRISPR-based biosensors. The Figure caption is reported below.

**Figure S2 caption.** Three-gene circuits for the construction of anti-CRISPR-based biosensors. A) Circuit scheme. The guide RNA is expressed either via an RGR cassette or the RNA polymerase III-dependent *SNR52* promoter. dSpCas9-Mxi1 is constitutively expressed under *GPD* promoter. B) Relative fluorescence between the output signals in presence and absence of the dSpCas9-Mxi1:gRNA complex. Each circuit is labelled with the abbreviation for the transcription unit leading the gRNA expression (as in main text Figure 1B) followed by "Mxi1". The highest fluorescence repression was achieved by expressing the guide RNA through the RGR cassette (RGR-Mxi1). The configuration where pSNR52 is placed on an integrative plasmids (pSNR52i-Mxi1) turned out to be more efficient than that where the gRNA is expressed via a multicopy plasmid (pSNR52m-Mxi1). The three mean relative fluorescence values (each obtained from 3 independent experiments) are significantly different from each other in statistical terms (as indicated by the "\*\*" symbol—two-sided Welch's t-test, p-value < 0.05.) C) Normalized gRNA expression. For each circuit, the relative amount of gRNA with respect to the mRNA of the *ACT1* gene was first calculated (mean value from three replicates during a single experiment—12.5 ng of cDNA were used). Then, gRNA relative expressions were normalized to the value obtained for pSNR52i-Mxi1, in analogy with the measurements on the NOT gates (see main text Figure 1C). Error bars were calculated on the normalized values by means of the error propagation formula. The *ADH1* promoter present in the RGR-Mxi1 configuration produces an amount of gRNA ( $0.48 \pm 0.22$ ) comparable to that of pSNR52 on an integrative plasmid (pSNR52i-Mxi1:  $1.00 \pm 0.34$ ) since a comparison via the two-sided Welch's t-test returned a p-value equal to = 0.076. In contrast, pSNR52m-Mxi1—pSNR52 is inside a multicopy plasmid—expresses 14.93 ( $\pm 4.50$ )-fold more gRNA than pSNR52i-Mxi1 (the "o" symbol points out a statistically significant difference with respect to the reference gate—two-sided Welch's t-test, p-value < 0.05). These results are in agreement with those from the NOT gates and confirm that gRNA expression does not play a major role in determining the fluorescence repression observed in these circuits.

Table S3: Relative fluorescence of the ten YES gates (sensing galactose) built in this work. Numerical values of the average ON/OFF ratio—with the corresponding standard deviation,  $\sigma_M$ —associated with the ten YES gates (see main text Figure 2B) are here given. For each gate, the p-value is calculated via two-sided Welch’s t-test to evaluate if a statistically significant difference exists between the fluorescence levels measured in the presence of galactose (ON state) and glucose (OFF state). YES gates were evaluated in a variable number of independent experiments (replicates). Only two gates (in italics) are not working since their p-value  $\geq 0.05$ —they do not discriminate between the ON and the OFF states properly.

| YES gate          | Mean ON/OFF ratio | $\sigma_M$ | p-value | Replicates |
|-------------------|-------------------|------------|---------|------------|
| A4-RGR            | 3.16              | 0.49       | 0.027   | 4          |
| yo_A4-RGR         | 2.87              | 0.57       | 0.001   | 5          |
| <i>A4-pSNR52i</i> | 1.30              | 0.14       | 0.180   | 4          |
| yo_A4-pSNR52i     | 1.41              | 0.27       | 0.047   | 5          |
| <i>A4-pSNR52m</i> | 0.92              | 0.26       | 0.680   | 5          |
| A2-RGR            | 3.94              | 0.52       | 0.005   | 4          |
| A2-pSNR52i        | 3.17              | 1.11       | 0.024   | 6          |
| A2-pSNR52m        | 2.41              | 0.59       | 0.029   | 3          |
| yo_A5-RGR         | 1.86              | 0.76       | 0.018   | 8          |
| yo_A5-pSNR52i     | 1.76              | 0.45       | 0.015   | 6          |

| <i>YES gates</i> | A4-RGR | yo_A4-RGR | A4-pSNR52i | yo_A4-pSNR52i | A4-pSNR52m | A2-RGR | A2-pSNR52i | A2-pSNR52m | yo_A5-RGR | yo_A5-pSNR52i |
|------------------|--------|-----------|------------|---------------|------------|--------|------------|------------|-----------|---------------|
| A4-RGR           | -      | 0.496     | 0.005      | 0.004         | 0.002      | 0.108  | 0.989      | 0.216      | 0.011     | 0.007         |
| yo_A4-RGR        | 0.496  | -         | 0.005      | 0.005         | 0.001      | 0.037  | 0.690      | 0.418      | 0.031     | 0.015         |
| A4-pSNR52i       | 0.005  | 0.005     | -          | 0.633         | 0.031      | 0.002  | 0.063      | 0.118      | 0.117     | 0.114         |
| yo_A4-pSNR52i    | 0.004  | 0.005     | 0.633      | -             | 0.030      | 0.001  | 0.068      | 0.127      | 0.193     | 0.215         |
| A4-pSNR52m       | 0.002  | 0.001     | 0.031      | 0.030         | -          | 0.0007 | 0.04       | 0.059      | 0.015     | 0.011         |
| A2-RGR           | 0.108  | 0.037     | 0.002      | 0.001         | 0.0007     | -      | 0.334      | 0.042      | 0.001     | 0.001         |
| A2-pSNR52i       | 0.989  | 0.690     | 0.063      | 0.068         | 0.04       | 0.334  | -          | 0.368      | 0.131     | 0.110         |
| A2-pSNR52m       | 0.216  | 0.418     | 0.118      | 0.127         | 0.059      | 0.042  | 0.368      | -          | 0.333     | 0.252         |
| yo_A5-RGR        | 0.011  | 0.031     | 0.117      | 0.193         | 0.015      | 0.001  | 0.131      | 0.333      | -         | 0.782         |
| yo_A5-pSNR52i    | 0.007  | 0.015     | 0.114      | 0.215         | 0.011      | 0.001  | 0.110      | 0.252      | 0.782     | -             |

Figure S3: YES gate comparison via two-sided Welch's t-test. Ten YES gates that respond to galactose (in red the name of the two non-working configurations) are analyzed in pairs via two-sided Welch's t-test (p-values are the matrix elements). Statistically significant difference is highlighted in green.

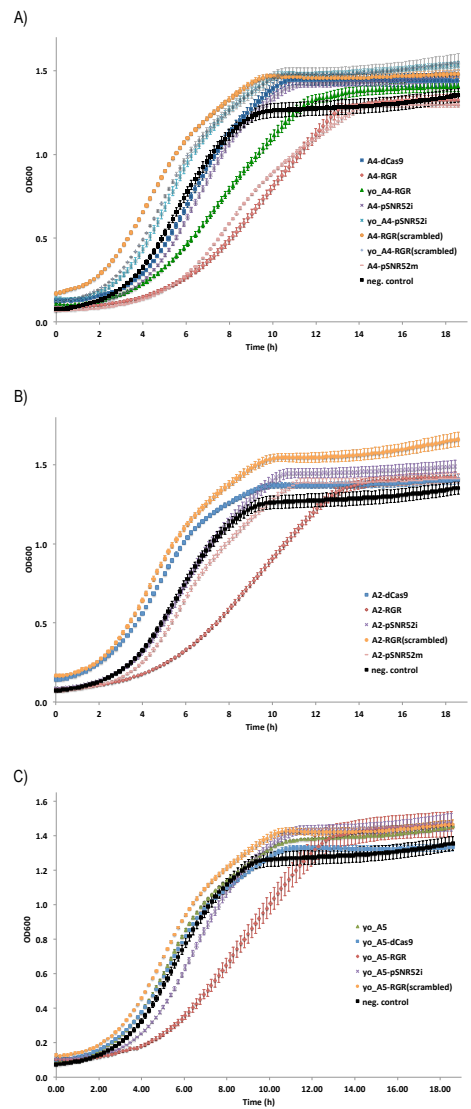

Figure S4: Growth curves in synthetic medium supplied with 2% glucose. A) LmAcIIA4- and yo\_LmAcIIA4-based biosensors. B) LmAcIIA2-containing biosensors. C) yo\_StAcIIA5-based biosensors. Every OD600 mean value was calculated on three replicas (single experiment).



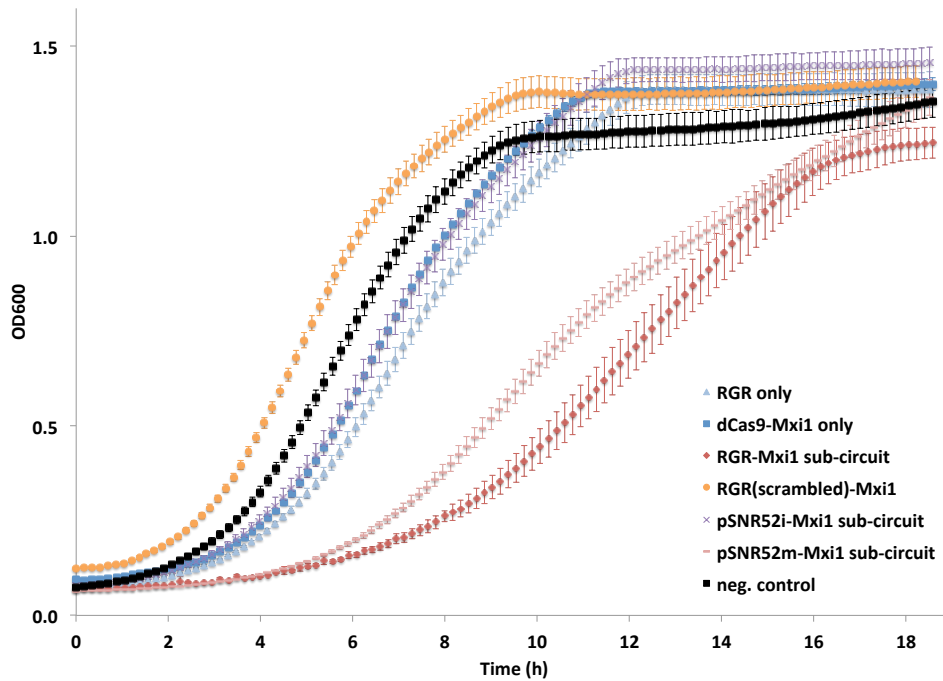

Figure S5: Growth curves of the sub-circuits used in the construction of the anti-CRISPR-based biosensors. The yeast strain byMM234 ("neg. control"), which expresses yEGFP under the synthetic promoter  $T_{\text{synth8\_pCYC1noTATA}}$ , shows similar growth rates when modified with the insertion of a single transcription unit for the expression of either the gRNA (via the RGR cassette—"RGR only") or the dSpCas9-Mxi1 protein ("dCas9-Mxi1 only"). Interestingly, the three-gene pSNR52i-Mxi1 sub-circuit—where the gRNA is expressed under the RNA polymerase III-type *SNR52* promoter on an integrative plasmid—presents a growth curve almost overlapping that associated with dCas9-Mxi1. Cells hosting the other two three-gene sub-circuits (RGR-Mxi1 and pSNR52m-Mxi1) grow more slowly. When the RGR expresses a "scrambled" gRNA unable to bind anywhere along the *S. cerevisiae* genome, a fast growth curve is achieved again.

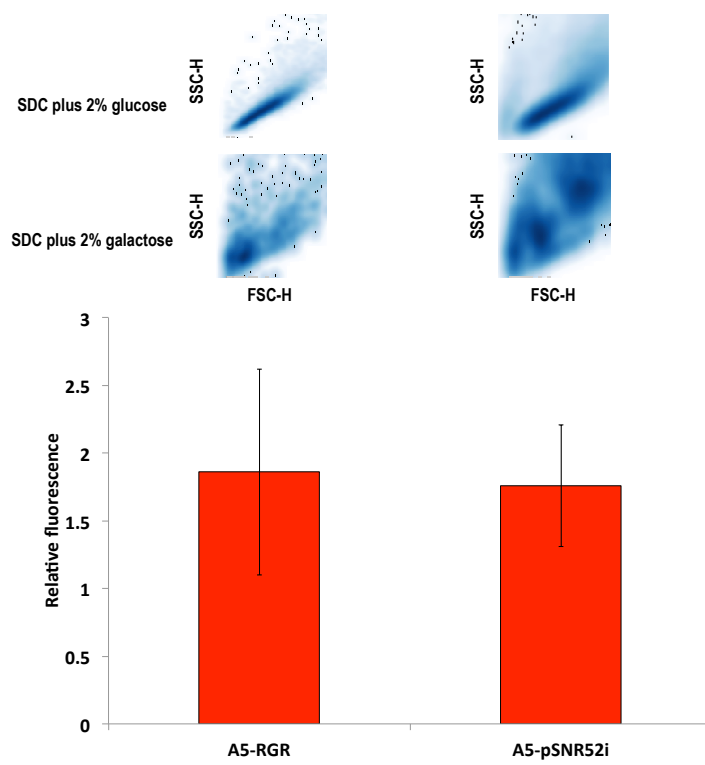

Figure S6: Dot plots from FACS experiments on yo\_StAcrIIA5-based biosensors. Both biosensors hosting yo\_StAcrIIA5 show a regular yeast cell population shape only after growing in synthetic medium supplied with glucose. In the presence of galactose a higher variability in cell dimension appears, especially in the yo\_A5-pSNR52i circuit.

Table S4: Viability coefficients (galactose biosensors). The mean values of the viability coefficients (see main text Figure 2C) together with their standard deviation,  $\sigma_M$ , were calculated over four replicates for each circuit (single experiment).

| YES gate      | Viab. coeff. | $\sigma_M$ |
|---------------|--------------|------------|
| A4-RGR        | 0.84         | 0.02       |
| yo_A4-RGR     | 0.91         | 0.03       |
| A2-RGR        | 0.83         | 0.04       |
| yo_A5-RGR     | 0.71         | 0.02       |
| yo_A5-pSNR52i | 0.80         | 0.09       |
| control       | 0.985        | 0.004      |

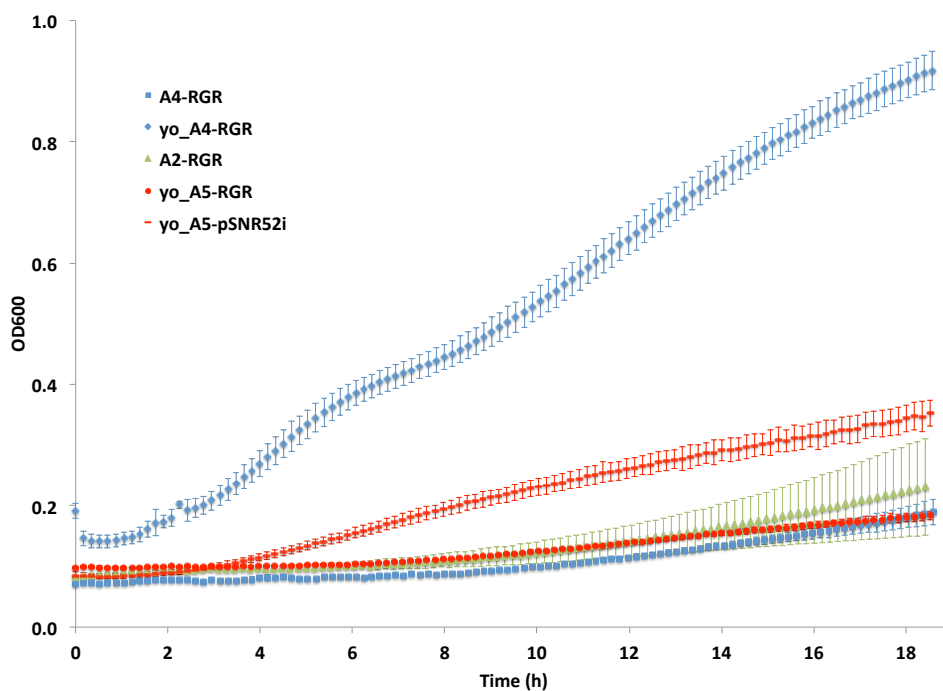

Figure S7: Comparison of the growth curves of the YES gates whose viability coefficients are given in Table S4.

| <i>YES gates</i> | A4-RGR | yo_A4-RGR | A2-RGR | yo_A5-RGR | yo_A5-pSNR52i | control |
|------------------|--------|-----------|--------|-----------|---------------|---------|
| A4-RGR           | -      | 0.024     | 0.614  | 0.0001    | 0.464         | 0.0002  |
| yo_A4-RGR        | 0.024  | -         | 0.029  | 0.0002    | 0.114         | 0.025   |
| A2-RGR           | 0.614  | 0.029     | -      | 0.006     | 0.613         | 0.005   |
| yo_A5-RGR        | 0.0001 | 0.0002    | 0.006  | -         | 0.181         | 8.3E-05 |
| yo_A5-pSNR52i    | 0.464  | 0.114     | 0.613  | 0.181     | -             | 0.036   |
| control          | 0.0002 | 0.025     | 0.005  | 8.3E-05   | 0.036         | -       |

Figure S8: Statistical comparison of the viability coefficients of five YES gates. The two-sided Welch's t-test was used to compare the viability coefficient of the five YES gates in Table S4 plus their negative control; p-values are the matrix elements. Statistically significant difference is highlighted in green.

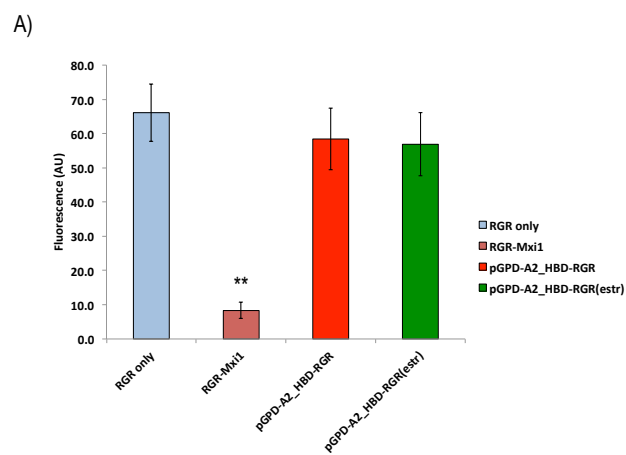

B)

| circuits               | RGR only | RGR-Mxi1  | pGPD-A2_HBD-RGR | pGPD-A2_HBD-RGR(estri) |
|------------------------|----------|-----------|-----------------|------------------------|
| RGR only               | -        | 0.010     | 0.324           | 0.259                  |
| RGR-Mxi1               | 0.010    | -         | 6.624E-07       | 1.855E-06              |
| pGPD-A2_HBD-RGR        | 0.324    | 6.624E-07 | -               | 0.122                  |
| pGPD-A2_HBD-RGR(estri) | 0.259    | 1.855E-06 | 0.122           | -                      |

Figure S9: Variant of the  $\beta$ -estradiol biosensor where the chimeric protein LmAcIIA2-HBD(ER) is expressed under the strong constitutive *GPD* promoter. The Figure caption is reported below.

**Figure S9 caption.** Variant of the  $\beta$ -estradiol biosensor where the chimeric protein LmAcIIA2-HBD(ER) is expressed under the strong constitutive *GPD* promoter. A) Fluorescence levels. "RGR only" is a two-gene circuit where, together with yEGFP, the sole gRNA is expressed (high fluorescence level). RGR-Mxi1 is the three-gene sub-circuit on which we built one  $\beta$ -estradiol biosensor. The fluorescence expressed by RGR-Mxi1 is low due to the action of dSpCas9-Mxi1:gRNA on the target promoter Tsynth8\_pCYC1noTATA. pGPD-A2\_HBD-RGR is the four-gene circuit where LmAcIIA2-HBD(ER) is synthesized under *GPD* promoter. In absence of  $\beta$ -estradiol (red bar), the fluorescence level should be comparable with that of RGR-Mxi1. However, we detected a much higher signal, similar to that of "RGR only". This can be explained with the fact that the strong *GPD* promoter leads to the production of a large quantity of LmAcIIA2-HBD(ER) proteins. Hence, some of them are not affected by the interactions with Hsp90 and enter the cell nucleus, where they bind and inhibit the dSpCas9-Mxi1:gRNA system, even in the absence of  $\beta$ -estradiol. The green bar (pGPD-A2\_HBD-RGR(estr)) gives the fluorescence level of the circuit pGPD-A2\_HBD-RGR upon induction with 1000 nM  $\beta$ -estradiol. B) Statistical comparison of the four fluorescence levels in (A) via two-sided Welch's t-test. Only the fluorescence expressed by RGR-Mxi1 is statistically different in a significant way from the other three ("\*\*\*" symbol in (A); p-values < 0.05 are highlighted in green). "RGR", pGPD-A2\_HBD-RGR, and pGPD-A2\_HBD-RGR(estr) are, in contrast, statistically undistinguishable. Hence, pGPD cannot be used to build  $\beta$ -estradiol-sensing circuits.

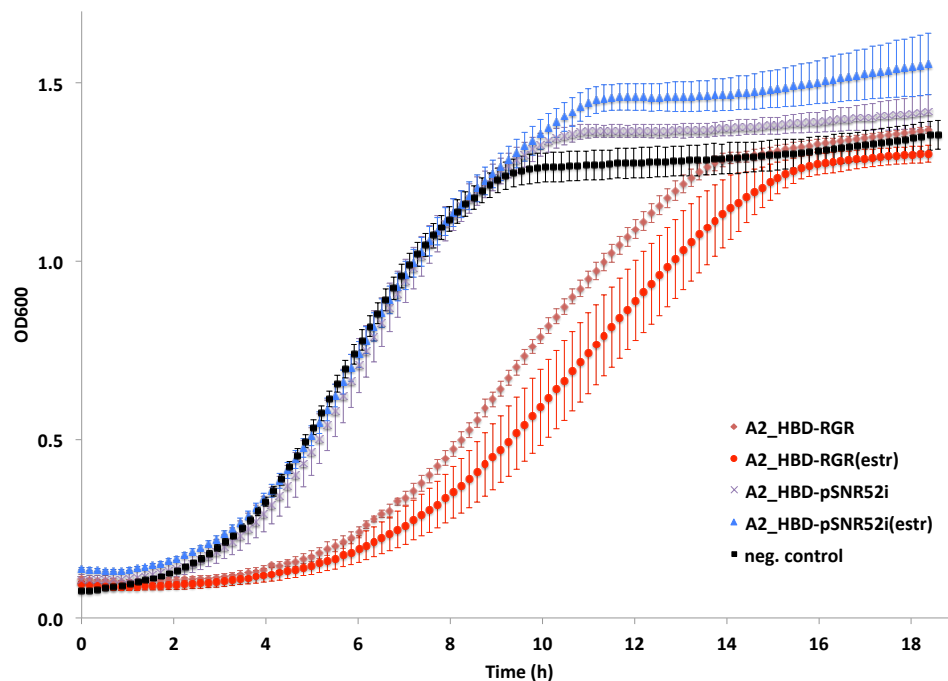

Figure S10: Growth curves of  $\beta$ -estradiol-sensing circuits. As in the case of the galactose biosensors, the RGR cassette appears to slow down circuit growth rate, both in the presence and absence of  $\beta$ -estradiol. However, this effect is not as dramatic as in the A2-RGR circuit (see main text Figure 3B). The gRNA expression system based on pSNR52 on an integrative plasmid has no apparent negative effects on cell growth. Both A2\_HBD-RGR(estr) and A2\_HBD-pSNR52i(estr) were induced with  $1 \mu\text{M}$   $\beta$ -estradiol, enough to assure a maximal fluorescence gain (see main text Figure 4B-C). Each value of OD600 was measured in three replicates (only two for A2\_HBD-RGR) during a single experiment.

Table S5: Viability coefficients ( $\beta$ -estradiol biosensors). The mean values of the viability coefficients, together with their standard deviation  $\sigma_M$ , were calculated over four replicates for each circuit (single experiment).

| YES gate             | Viab. coeff. | $\sigma_M$ |
|----------------------|--------------|------------|
| A2_HDB-RGR           | 0.994        | 0.002      |
| A2_HDB-RGR(estr)     | 0.998        | 0.004      |
| A2_HDB-pSNR52i       | 0.997        | 0.001      |
| A2_HDB-pSNR52i(estr) | 0.998        | 0.001      |

## Plasmids realized in this work

Table S6: List of the plasmids assembled in this work.

| Plasmid name | Construct                                                                   |
|--------------|-----------------------------------------------------------------------------|
| pMM218       | pRSII404-pRPR1-gRNA-RPR1t                                                   |
| pMM219       | pRSII424-pRPR1-gRNA-RPR1t                                                   |
| pMM260       | pRSII405-Tsynth8_pCYC1noTATA-yEGFP-CYC1t                                    |
| pMM465       | pRSII404-pSNR52-BpiI(GATC)-place_for_spacer-BpiI(GTTT)-SpCas9_repeat-SUP4t  |
| pMM522       | pRSII403-pGAL1-LmAcrIIA4-CYC1t                                              |
| pMM524       | pRSII404-pSNR52-gRNA-SUP4t                                                  |
| pMM536       | pRSII424-pSNR52-gRNA-SUP4t                                                  |
| pMM551       | pRSII406-pGPD-ATG-XbaI-space_for_NLS-dSpCas9-SalI-GGTGGA-STOP-CYC1t         |
| pMM554       | pRSII404-pADH1-RGR-ADH1t                                                    |
| pMM559       | pRSII406-pGAL1-ATG-XbaI-space_for_NLS-dSpCas9-SalI-GGTGGA-STOP-CYC1t        |
| pMM562       | pRSII406-pGPD-NLS-dSpCas9-CYC1t                                             |
| pMM563       | pRSII406-pGAL1-NLS-dSpCas9-CYC1t                                            |
| pMM573       | pRSII406-pGPD-ATG-XbaI-space_for_NLS-dSpCas9-SalI-GGTGGA-GS-Mxi1-STOP-CYC1t |
| pMM574       | pRSII406-pGAL1-ATG-XbaI-spacer-SalI-GGTGGA-GS-Mxi1-STOP-CYC1t               |
| pMM578       | pRSII406-pGPD-dSpCas9-GS-Mxi1-CYC1t                                         |
| pMM579       | pRSII406-pGAL1-dSpCas9-GS-Mxi1-CYC1t                                        |
| pMM609       | pRSII403-pGAL1-LmAcrIIA2-CYC1t                                              |
| pMM625       | pRSII403-pGAL1-yo_StAcrIIA5-CYC1t                                           |
| pMM626       | pRSII403-pGAL1-yo_LmAcrIIA4-CYC1t                                           |
| pMM637       | pRSII403-pTEF2-LmAcrIIA2-GS-HBD(ER)-CYC1t                                   |
| pMM676       | pRSII403-pGPD-LmAcrIIA2-GS-HBD(ER)-CYC1t                                    |
| pMM685       | pRSII404-pADH1-RGR(scrambled gRNA)-ADH1t                                    |



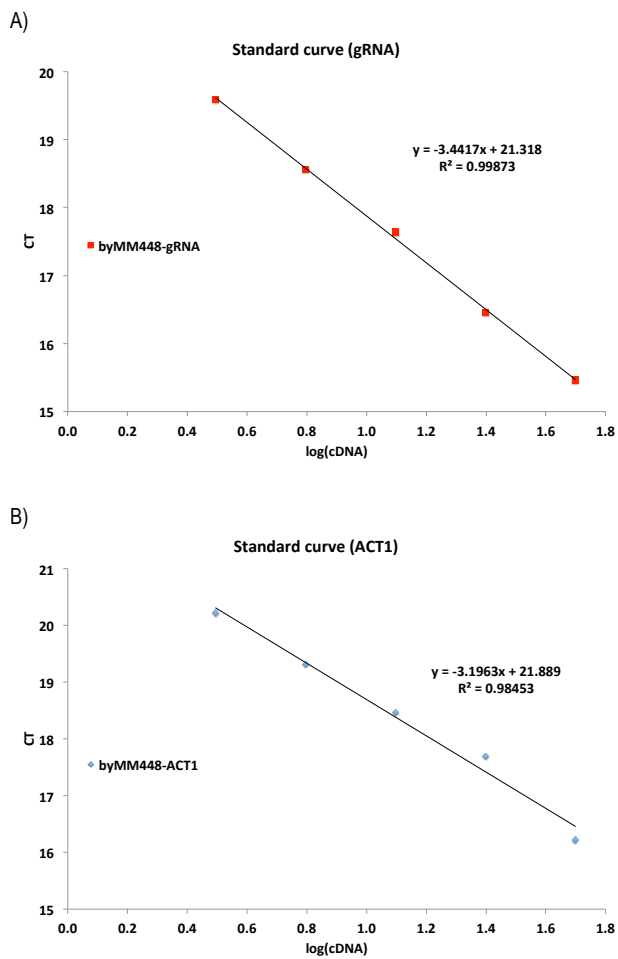

Figure S11: Standard curves. cDNA (diluted from 50 ng to 3.125 ng) from the strain byMM448 was used as a template for both standard curves. A) A portion (90 nt) of the gRNA targeting the synthetic promoter *Tsynth8\_pCYC1noTATA* was amplified with primers oMM940/941. The amplification efficiency resulted equal to 1.95. B) Primers oMM919/920 were used to PCR out a trait of the *ACT1* gene (149 nt). In this case, the amplification efficiency turned out to be 2.06.

## Yeast strains used/realized in this work

Table S7: List of yeast strains, realized in this work (plus the original one, byMM111). Plasmids are described in Tables S6. \*: transformed with the multicopy plasmid pMM536; \*\*: transformed with the multicopy plasmid pMM219.

| Strain name | Genotype                                                                |
|-------------|-------------------------------------------------------------------------|
| byMM111     | CEN.PK2-1C (MATa; his3D1; leu2-3_112; ura3-52; trp1-289; MAL2-8c; SUC2) |
| byMM234     | byMM111 pMM260::LEU2                                                    |
| byMM376     | byMM111 pMM260::LEU2 pMM554::TRP1                                       |
| byMM387     | byMM111 pMM260::LEU2 pMM554::TRP1 pMM563::URA3                          |
| byMM389     | byMM111 pMM260::LEU2 pMM554::TRP1 pMM579::URA3                          |
| byMM395     | byMM111 pMM260::LEU2 pMM554::TRP1 pMM578::URA3                          |
| byMM398     | byMM111 pMM260::LEU2 pMM579::URA3                                       |
| byMM399     | byMM111 pMM260::LEU2 pMM578::URA3                                       |
| byMM400     | byMM111 pMM260::LEU2 pMM579::URA3                                       |
| byMM407     | byMM111 pMM260::LEU2 pMM554::TRP1 pMM578::URA3 pMM522::HIS3             |
| byMM408     | byMM111 pMM260::LEU2 pMM554::TRP1 pMM578::URA3 pMM522::HIS3             |
| byMM410     | byMM111 pMM260::LEU2 pMM578::URA3 pMM522::HIS3                          |
| byMM418     | byMM111 pMM260::LEU2 pMM554::TRP1 pMM578::URA3 pMM609::HIS3             |
| byMM420     | byMM111 pMM260::LEU2 pMM578::URA3 pMM522::HIS3 *                        |
| byMM423     | byMM111 pMM260::LEU2 pMM524::TRP1 pMM578::URA3                          |
| byMM425     | byMM111 pMM260::LEU2 pMM554::TRP1 pMM578::URA3 pMM626::HIS3             |
| byMM426     | byMM111 pMM260::LEU2 pMM554::TRP1 pMM578::URA3 pMM625::HIS3             |
| byMM427     | byMM111 pMM260::LEU2 pMM524::TRP1 pMM578::URA3 pMM522::HIS3             |
| byMM428     | byMM111 pMM260::LEU2 pMM524::TRP1 pMM578::URA3 pMM626::HIS3             |
| byMM429     | byMM111 pMM260::LEU2 pMM524::TRP1 pMM578::URA3 pMM609::HIS3             |
| byMM430     | byMM111 pMM260::LEU2 pMM524::TRP1 pMM578::URA3 pMM625::HIS3             |
| byMM446     | byMM111 pMM260::LEU2 pMM524::TRP1 pMM579::URA3                          |
| byMM448     | byMM111 pMM260::LEU2 pMM579::URA3 *                                     |
| byMM450     | byMM111 pMM260::LEU2 pMM578::URA3 *                                     |
| byMM458     | byMM111 pMM260::LEU2 pMM554::TRP1 pMM578::URA3 pMM637::HIS3             |
| byMM459     | byMM111 pMM260::LEU2 pMM524::TRP1 pMM578::URA3 pMM637::HIS3             |
| byMM460     | byMM111 pMM260::LEU2 pMM579::URA3 **                                    |
| byMM461     | byMM111 pMM260::LEU2 pMM218::TRP1 pMM579::URA3                          |
| byMM463     | byMM111 pMM260::LEU2 pMM578::URA3 pMM609::HIS3 *                        |
| byMM469     | byMM111 pMM260::LEU2 pMM524::TRP1 pMM563::URA3                          |
| byMM470     | byMM111 pMM260::LEU2 pMM563::URA3 *                                     |
| byMM505     | byMM111 pMM260::LEU2 pMM578::URA3 pMM609::HIS3                          |
| byMM506     | byMM111 pMM260::LEU2 pMM578::URA3 pMM625::HIS3                          |
| byMM507     | byMM111 pMM260::LEU2 pMM625::HIS3                                       |
| byMM514     | byMM111 pMM260::LEU2 pMM685::TRP1 pMM578::URA3                          |
| byMM522     | byMM111 pMM260::LEU2 pMM685::TRP1 pMM578::URA3 pMM609::HIS3             |
| byMM523     | byMM111 pMM260::LEU2 pMM685::TRP1 pMM578::URA3 pMM522::HIS3             |
| byMM524     | byMM111 pMM260::LEU2 pMM685::TRP1 pMM578::URA3 pMM626::HIS3             |
| byMM525     | byMM111 pMM260::LEU2 pMM685::TRP1 pMM578::URA3 pMM625::HIS3             |
| byMM528     | byMM111 pMM260::LEU2 pMM554::TRP1 pMM578::URA3 pMM676::HIS3             |

## DNA part sequences

### Promoters

#### pSNR52

CTTTGAAAAGATAATGTATGATTATGCTTTCACTCATATTTATACAGAACTTGATG  
TTTTCTTTTCGAGTATATACAAGGTGATTACATGTACGTTTGAAGTACAACCTTAGAT  
TTTGTAAGTGCCCTCTTGGGCTAGCGGTAAAGGTGCGCATTFTTTTACACCCCTACAAT  
GTTCTGTTCAAAAAGATTTTGGTCAAACGCTGTAGAAGTGAAAGTTGGTGCGCATGT  
TTCGGCGTTTCGAACTTCTCCGCAGTGAAAGATAAATGATC

#### pRPR1

GGGGGATCTGCCAATTGAACATAACATGGTAGTTACATATACTAGTAATATGGTTCG  
GCACACATTAAGTATAAAAACCTATCTGAATTACGAATTACATATATTGGTCATAA  
AAATCAATCAATCATCGTGTGTTTATATGTCTTATCTAAGTATAAGAATATCCAT  
AGTTAATATTCACTTACGCTACCTTTTAACTGTAATCATTGTCAACAGGATATGTTA  
ACGACCCACATTGATAAACGCTAGTATTTCTTTTTCCTCTTCTTATTGGCCGGCTGTC  
TCTATACTCCCCTATAGTCTGTTTCTTTTCGTTTCGATTGTTTTACGTTTGAGGCCTC  
GTGGCGCACATGGTACGCTGTGGTGTCTCGCGCTGGGAACGAACTCTGGGAGCTGC  
GATTGGCAGAAGCTT

#### Tsynth8\_pCYC1noTATA

TATATAAACTCATTTACTTATGTAGGAATAAAGAGTATCATCTTTCAAATCTTTTCCTT  
ATACATAGGACCTTTGCAGCATAAATTACTATACTTCTATAGACACACAAACACAAATA  
CACACACTAAATTAATA

#### pGAL1

ATATACATATCCATATCTAATCTTACTTATATGTTGTGGAAATGTAAAGAGCCCCATTAT  
CTTAGCCTAAAAAACCTTCTCTTTGGAACTTTCAGTAATACGCTTAACTGCTCATTGC  
TATATTGAAGTACGGATTAGAAGCCGCCGAGCGGGTGACAGCCCTCCGAAGGAAGACTC  
TCCTCCGTGCGTCCCTCGTCTTACCAGTTCGCGTTCCTGAAACGCAGATGTGCCTCGCGCC  
GCACTGCTCCGAACAATAAAGATTCTACAATACTAGCTTTTATGGTTATGAAGAGGAAAA  
ATTGGCAGTAACCTGGCCCCACAACTTCAAATGAACGAATCAAATTAACAACCATAGG  
ATGATAATGCGATTAGTTTTTTAGCCTTATTTCTGGGGTAATTAATCAGCGAAGCGATGAT  
TTTTGATCTATTAACAGATATATAAATGCAAAAACCTGCATAACCACTTAACTAATACTTT  
CAACATTTTCGGTTTGTATTACTTCTTATTCAAATGTAATAAAAAGTATCAACAAAAAATTG  
TTAATATACCTCTATACTTTAACGTCAAGGAGAAAAAACTATA

#### pADH1

GGGTGTACAATATGGACTTCCTCTTTTCTGGCAACCAAACCCATACATCGGGATTCCCTATAA  
TACCTTCGTTGGTCTCCCTAACATGTAGGTGGCGGAGGGGAGATATACAATAGAACAGATAC  
CAGACAAGACATAATGGGCTAAACAAGACTACACCAATTACACTGCCTCATTGATGGTGGTA  
CATAACGAACTAATACTGTAGCCCTAGACTTTGATAGCCATCATCATATCGAAGTTTCACTACC  
CTTTTCCATTTGCCATCTATTGAAGTAATAATAGGCGCATGCAACTTCTTTTCTTTTCTTT  
CTTTTCTCTCTCCCCGTTGTGTCTCACCATATCCGCAATGACAAAAAATGATGGAAGACA  
CTAAAGGAAAAAATTAACGACAAAGACAGCACCAACAGATGTCGTTGTTCCAGAGCTGATGA  
GGGGTATCTCGAAGCACACGAACTTTTTCCTTCCCTTCAATCACGCACACTACTCTCTAATGA  
GCAACGGTATACGGCCTTCCCTCCAGTTACTTGAATTTGAAATAAAAAAAGTTTGCTGTCTT  
GCTATCAAGTATAAATAGACCTGCAATTATTAATCTTTTGTTCCTCGTCATTGTTCTCGTTCC  
CTTTCTTCCCTTGTTCCTTTTCTGCACAATATTTCAAGCTATACCAAGCATACAATCAACTATC  
TCATATACA

## **pGPD**

CAGTTCGAGTTTATCATTATCAATACTGCCATTTCAAAGAATACGTAAATAATTAATAGTAGTG  
ATTTTCCTAACTTTATTTAGTCAAAAAAATTAGCCTTTTAATTCTGCTGTAACCCGTACATGCC  
AAAAATAGGGGGCGGGTTACACAGAAATATATAACATCGTAGGTGTCTGGGTGAACAGTTTATTCC  
TGGCATCCACTAAATATAATGGAGCCCGCTTTTAAAGCTGGCATCCAGAAAAAAAAGAATCCC  
AGCACCAAAATATTGTTTTCTTCACCAACCATCAGTTCATAGGTCCATTCTCTTAGCGCAACTAC  
AGAGAACAGGGGCACAAACAGGCACAAAAACGGGCACAACCTCAATGGAGTGATGCAACCTGCCT  
GGAGTAAATGATGACACAAGGCAATTGACCCACGCATGTATCTATCTCATTTTCTTACACCTTCTA  
TTACCTTCTGCTCTCTCTGATTTGGAAAAAGCTGAAAAAAAAGGTTGAAACCAGTTCCTGAAAT  
TATTCCTTACTTGACTAATAAGTATATAAAGACGGTAGGTATTGATTGTAATTCTGTAAATCTATT  
TCTTAAACTTCTTAAATTCTACTTTTATAGTTAGTCTTTTTTTTTAGTTTTTAAACACCAAGAACTT  
AGTTTCGAATAAACACACATAAACAAAAA

## **pTEF2**

GCTACCTATATTCACCATAACATCAATCATGCGGTTGCTGGTGTATTTACCAATAATGTTAATGT  
ATATATATATATATATATATGGGGCCGTATACTTACATATAGTAGATGTCAAGCGTAGGCGCTTCCCCTG  
CCGGCTGTGAGGGCGCCATAACCAAGGTATCTATAGACCGCCAATCAGCAAACCTACCTCCGTACATT  
CATGTTGCACCCACACATTTATACACCAGACCGCGACAAATTACCCATAAGGTTGTTTGTGACGGC  
GTGCTACAAGAGAACGTGGGAACTTTTTAGGCTCACCAAAAAAGAAAAGAAAAATACGAGTTGCT  
GACAGAAGCCTCAAGAAAAAAAATTTCTTTCGACTATGCTGGAGGCAGAGATGATCGAGCCGG  
TAGTTAACTATATATAGCTAAATTTGGTTCCATCACCTTCTTTTCTGGTGTGCTCCTTCTAGTGCTAT  
TTCTGGCTTTTCTTATTTTTTTTTTCCATTTTCTTTCTCTTTCTAATATATAAATTTCTCTTGCA  
TTTTCTATTTTTCTCTCTATCTATTCTACTTGTATTCCCTCAAGTTTTTTTTTAAGGAGTACTT  
GTTTTTAGAATATACGGTCAACGAACTATAATTAATAAAAC

## **Coding Sequences**

### **guide RNA**

ATAAACTCATTTACTTATGTGTTTTAGAGCTAGAAATAGCAAGTTAAAATAAGGCTAGTCCGTT  
ATCAACTTGAAAAAGTGGCACCGAGTCGGTGCTTTT

### **RGR**

GTTTATCTGATGAGTCCGTGAGGACGAAACGAGTAAGCTCGTCATAAACTCATTTACTTATGTG  
TTTTAGAGCTAGAAATAGCAAGTTAAAATAAGGCTAGTCCGTTATCAACTTGAAAAAGTGGCA  
CCGAGTCGGTGCTTTTGGCCGGCATGGTCCCAGCCTCCTCGCTGGCGCCGGCTGGGCAACATG  
CTTCGGCATGGCGAATGGGAC

### **yEGFP**

ATGTCTAAAGGTGAAGAATTATTCCTGCTGTTGTCCCAATTTTGGTTGAATTAGATGGTGATGTTA  
ATGGTCACAAATTTTCTGTCTCCGGTGAAGGTGAAGGTGATGCTACTTACGGTAAATTGACCTTAAA  
ATTTATTTGTACTACTGGTAAATTGCCAGTTCCATGGCCAACCTTAGTCACTACTTTTCGGTTATGGTG  
TTCAATGTTTTGCGAGATACCCAGATCATATGAAACAACATGACTTTTTCAAGTCTGCCATGCCAGAA  
GGTTATGTTCAAGAAAGAACTATTTTTTTCAAAGATGACGGTAACTACAAGACCAGAGCTGAAGTCAA  
GTTTGAAGGTGATACCTTAGTTAATAGAATCGAATTAAGGATTTGATTTTAAAGAAGATGGTAACAT  
TTTAGGTCACAAATGGAAATACAACCTATAACTCTCACAAATGTTTACATCATGGCTGACAAACAAAAGAA  
TGGTATCAAAGTTAACTTCAAATTTAGACACAAACATTGAAGATGGTTCTGTTCAATTAGCTGACCATTA  
TCAACAAAATACTCCAATTGGTGATGGTCCAGTCTTGTTACCAGACAACCATTACTTATCCACTCAATCT  
GCCTTATCCAAAGATCCAAACGAAAAGAGAGACCACATGGTCTTGTTAGAATTTGTTACTGCTGCTGGTA  
TTACCCATGGTATGGATGAATTGTACAAATAA

## NLS\_dSpCas9

ATGTCTAGAGCCCCAAAGAAGAAGAGAAAAGTTAGACCCGGGATAAGAAATACTCTATTGGTTTTGGCTA  
TCGGTACAAACTCTGTTGGTTGGGCTGTTATTACTGATGAATACAAGGTTCCATCCAAGAAGTTCAAGGT  
TTTGGGTAACACTGATAGACACTCCATCAAAAAGAACTTGATTGGTGCCTTGTGTTTCGATTCTGGTGAA  
ACTGCTGAAGCTACTAGATTGAAAAGAACCGCTAGAAGAAGATACACCAGAAGAAAGAACAGAATCTGCT  
ACTTGCAAGAAATCTTCTCCAACGAAATGGCCAAGGTTGATGATTCATTCTTCCACAGATTGGAAGAATC  
CTTCTTGGTTCGAAGAAGATAAGAAGCACGAAAGACATCCAATCTTCGGTAACATCGTTGATGAAGTTGCT  
TACCACGAAAAGTACCCAATCTTACCATTTGAGAAAAGAAGTTGGTTGACTCTACCGATAAGGCTGATTT  
GAGATTGATCTATTTGGCTTTGGCCACATGATTAAGTTCAGAGGTCATTTCTTGATCGAAGGTGATTTGA  
ACCCAGATAACTCCGATGTTGATAAGTTGTTTCATCCAATTAAGTCCAAACCTACAATCAATTATTCGAAGAA  
AACCCAATCAACGCCTCTGGTGTGATGCTAAAGCTATTTTGTCTGCCAGATTGTCCAAGTCCAGAAGATT  
AGAAAATTTGATCGCCCAATTACCAGGTGAAAAGAAGAAATGGTTTGTTCGGTAATTTGATTGCCTTGTCTT  
TGGGTTTACTCCAACTTCAAGTCCAATTTGATTTGGCTGAAGATGCCAAGTTGCAATTATCTAAGGAT  
ACCTACGATGACGATTTGGATAACTTGTGGCTCAAATCGTGATCAATACGCTGATTTGTTTTTGGCTGC  
TAAGAACTTGTCCGATGCCATTTTGTGTCCGATATTTTGAGAGTCAACACCGAAATTAAGGCTCCAT  
TGTCTGCCTCTATGATCAAAAAGATACGATGACACACCACCAAGACTTGACTTTTGTGAAGGCTTGGTCCAG  
CAACAATTACCTGAAAAGTACAAAGAAATTTTCTTCGATCAATCCAAGAACGGTTACGCCGGTTATATTGA  
TGGTGGTGTCTCTCAAGAAGAATTTTACAAGTTCATCAAGCCAATCTTGAAAAGATGGACGGTACTGAA  
GAATTATTGGTCAAGTTGAACAGAGAAGATTTGTTGAGAAAAGCAAAGAACCTTCGACAACGGTCTTATTC  
CACATCAAATTCACTTGGGTGAATTCACGCAATTTTGAAGACAAGAAGATTTTTATCCATCTTGAA  
GGACAACAGAGAAAAGATCGAAAAGATTCTGACCTTCAGAATCCCTTACTACGTTGGTCCATTGGCTAGAG  
GTAATCAAGATTTGCCTGGATGACTAGAAAGTCCGAAGAACTATTACTCCTTGAAGTTCGAAGAAGTT  
GTAGATAAGGGTGTCTTCTGCCAATCCTTTATTGAAAAGATGACCAACTTCGACAAGAAGTTCGCAAAACG  
AAAAGGTTTTGCAAAAGCACTCTTTGTTGTACGAATACTTCACCGTCTACAACGAATTCGACTAAGGTTAA  
GTACGTCACCGAAGGTATGAGAAAACCAGCTTTTTTATCCGGTGAACAAAAGAAGGCTATCGTCGATTTG  
TTGTTCAAGACCAACAGAAAGGTTACTGTCAAGCAATTAAGAAGATTACTTCAAGAAAATCGAATGCT  
TCGACTCCGTTGAAATTTCTGGTGTGTCGAAGATGATTCATCAATCCCTCTTTAGGTACTTACCATGACTTGTG  
AAAATCATCAAGGACAAGGATTTCTTGGACAACGAAAACGAAGATATTTTGAAGATATTGTCTTGA  
CATTGACCTTGTGTTGAAGATAGAGAAATGATTGAAGAAAGATTGAAAACCTACGCCCACTTGTTCGATGAT  
AAGGTTATGAAGCAATTAAGAGAAGAAGATACACTGGTTGGGGTAGATTGTCCAGAAAATGATTAACG  
GTATCAGAGACAAGCAATCCGGTAAGACCATTTTGGACTTTTTTGAAGTCTGATGTTTTGCTAACAGAAAC  
TTCATGCAATTAATCCACGACGATTCCTTGACTTTCAAAGAAGATATACAAAAGGCCAAGTCTCTGGTCA  
AGGTGATTTCTTACATGAACATATCGCTAAGTGGCTGGTTCTCCAGCTATTAAGAAGGGTATTTTACAAA  
CCGTTAAGGTCGTTGACGAATTTGGTCAAAGTTATGGGTAGACATAAGCCAGAAAACATCGTTATCGAAATG  
GCTAGAGAAAATCAAACCACCCAAAAGGGTCAAAAAGAACTCCAGAGAAAAGAAATGAAGAGAATCGAAGAAG  
GTATCAAAGAATTTGGGTTCCCAAATTTTGAAGAACACCCAGTTGAAAACACCCAATTACAAAACGAAAA  
GTTGTACTTGTACTACTTGCAAAACGGTAGAGATATGTACGTTGACCAAGAATTTGGACATCAACAGATTTGT  
CTGATTACGATGTTGACGCTATCGTTCCACAATCTTTTTTGAAGGATGACTCCATGACAACAAAGTCTTG  
ACTAGATCCGATAAAGAATAGAGGTAAGTCCGATAACGTTCCATCTGAAGAAGTCGTTAAGAAAATGAAGAA  
CTATTGGAGACAATTATTGAACGCCAAGTTGATCACCCAAAGAAAGTTTGAACAATTTGACCAAGGCTGAAA  
GAGGTGGTTTTGTCTGAATTTGGATAAGGCAGGTTTCATCAAAAAGACAATTAGTAGAAAACCAGACAAATCACC  
AAGCACGTTGCTCAAATTTTGGATAGTAGAATGAACACTAAGTACGACGAAAACGACAAATTTGATCAGAGA  
AGTTAAGGTCATTACCTTGAAGTCCAAGTTGGTTTTCCGATTTTCAGAAAGGACTTCCAATTTCTACAAGGTC  
GAGAAATCAACAACCTACCATCATGCACATGATGCTTACTTGAATGCTGTTGTTGGTACTGCCTTGATTAAGA  
AGTATCCAAAGTTGGAATCCGAATTTGTCTACGGTGATTACAAGGTTTACGACGTTAGAAAAGATGATCGCCA  
AGTCCGAACAAGAAATTTGGTAAAGCTACTGCCAAATACTTCTTCTACTCCAATATTATGAATTTCTTTAAGA  
CCGAAATCACTTTGGCCAACGGTGAATTTAGAAAAAGACCATTGATTGAAAATAATGGTGAAACAGGTGAA  
ATCGTTTGGGATAAGGGTAGAGATTTTGGCACTGTTAGAAAAGGTTATTTGTCATGCCACAAGTAAACATCGTC  
AAAAAGACCGAAGTTCAAACCTGGTGGTTTTCTCAAAGAATCCATTTTGCCTAAGAGAAAACCTCCGATAAGTT  
GATCGCTAGAAAAAAGACTGGGACCCAAAAGTACCGTGGTTTTTGAATTTCTCCAAGTGTGCTTACTCTG  
TTTTGGTTGTTGCTAAGGTCGAAAAGGGTAAAGAGTAAGAAGTTGAAGTCCGTCAAAAGAATTATTAGGTATC  
ACTATCATGGAAAAGATCCTCATTCGAAAAGAATCCTATCGACTTTTTTGAAGCCAAGGGTTACAAAAGAAGT  
CAAGAAGGACTTGATCATTAAGTTGCCAAAGTACAGTTTGTTCGAATTTGAAAATGGTAGAAAAGAGAATGT  
TGGCTTCTGCCGGTGAATTACAAAAGGGTAATGAATTTGGCTTTGCCATCCAAGTACGTTAATTTCTTATACT  
TGGCCTCCCCTACGAAAATTTGAAAGGTTCTCCTGAAGATAACGAACAAAAGCAATTTATTTGTGCAACAAC  
ACAAGCACTACTTGGACGAAATCATTGAACAAATTTCCGAATTTTCCAAAAGAGTCAATTTTGGCTGACGCCA  
ATTTGGACAAAGTTTTTGTGAGCTTACAACAAGCACAGAGATAAGCCAATTAGAGAACAAGCTGAAAACATC  
ATTCATTTGTTCACTTTGACTAACTTGGGTGCTCCAGCTGCTTTAAGTATTTTCGATACCACTATCGACAGAA

AGAGATACACCTCTACCAAAGAAGTTTTGGACGCTACTTTGATCCACCAATCTATTACTGGTTTTGTACGAAA  
CTAGAATCGACTTGTCTCAATTAGGTGGTGATGGTTCTGGTAGATCTGGAGTCGACGGTGGATAA

**Mxi1**

ATGATTAATGTGCAAAGGCTGTTAGAAGCCGCAGAGTTTTTAGAAAGAAGAGAAAGAGAATGCGAACACG  
GGTATGCCAGTTCTTTCCCTAGCATGCCCTCTCCCAGATGA

**HBD(ER)**

TCTGCTGGAGACATGAGAGCTGCCAACCTTTGGCCAAGCCCGCTCATGATCAAACGCTCTAAGAAGAACA  
GCCTGGCCTTGTCCCTGACGGCCGACCAGATGGTCAGTGCCTTGTGGATGCTGAGCCCCCATACTCTAT  
TCCGAGTATGATCCTACCAGACCCTTCAGTGAAGCTTCGATGATGGGCTTACTGACCAACCTGGCAGACAG  
GGAGCTGGTTCACATGATCAACTGGGCGAAGAGGGTGCCAGGCTTTGTGGATTTGACCCTCCATGATCAG  
GTCCACCTTCTAGAATGTGCCTGGCTAGAGATCCTGATGATTGGTCTCGTCTGGCGCTCCATGGAGCACCC  
AGTGAAGCTACTGTTTGTCTCCTAACTTGTCTTTGGACAGGAACCAGGAAAATGTGTAGAGGGCATGGTG  
GAGATCTTCGACATGCTGCTGGCTACATCATCTCGGTTCCGCATGATGAATCTGCAGGGAGAGGAGTTTGT  
GTGCCTCAAATCTATTATTTTGTCTAATTCTGGAGTGTACACATTTCTGTCCAGCACCTGAAGTCTCTGG  
AAGAGAAGGACCATATCCACCGAGTCCCTGGACAAGATCACAGACACTTTGATCCACCTGATGGCCAAGGC  
AGGCCTGACCCTGCAGCAGCAGCACCAGCGGCTGGCCCAGCTCCTCCTCATCCTCTCCACATCAGGCACA  
TGAGTAACAAAGGCATGGAGCATCTGTACAGCATGAAGTGCAAGAACGTGGTGCCCTCTATGACCTGCTG  
CTGGAGATGCTGGACGCCACCCTACATGCGCCACTAGCCGTGGAGGGGCATCCGTGGAGGAGACGGA  
CCAAAGCCACTTGGCCACTGCGGGCTCTACTTCATCGTAA

**LmAcrIIA2**

ATGACATTAACAAGAGCACAAAAAAGTATGCAGAAGCGATGCACGAGTTTATAAATATGGTGGATGAC  
TTTGAAGAGTCTACACCGGATTTTGC AAAGGAAGTTCTACATGATTTCTGACTATGTAGTTATTACAAAA  
AATGAAAAATATGCAGTAGCTCTTTGCTCTCTTAGCACTGATGAATGTGAATATGATACTA ACTTATACT  
TAGATGAAAAATGGTTGATTACTCAACAGTTGACGTAAACGGTGTGACATACTACATCAACATTGTTGA  
AACTAACGATATCGATGATTTAGAAATCGCTACGGATGAAGATGAGATGAAAAGTGGCAACCAAGAAATT  
ATTTTAAAAAGTGAGTTGAAGTAA

**LmAcrIIA4**

ATGAATATTAATGACTTAATTAGAGAAATCAAAAACAAAGATTACACAGTGAAATTGAGTGGTACGGAT  
AGCAATAGTATCACACAGCTAATTATTCGCGTTAATAATGATGGCAACGAGTATGTAATTTCTGAAAGT  
GAAAATGAATCAATCGTTGAAAAATTCATCTCTGCATTCAAAACGGTTGGAATCAAGAATACGAGGA  
TGAAGAAGAATTTTATAATGACATGCAAACAATCACCTTAAAAAGTGAGTTGAACTAA

**yo\_LmAcrIIA4**

ATGAATATTAATGATTTGATTAGAGAAATTA AAAATAAAGATTATACTGT TAAATTTGTCTGGTACTGA  
TTCTAATCTATTACTCAATTGATTATTAGAGTTAATAATGATGGTAATGAATATGTTATTTCTGAATC  
TGAAAATGAATCTATTGTTGAAAAATTTATTTCTGCTTTTAAAAATGGTTGGAATCAAGAATACGAA  
GATGAAGAAGAATTTTATAATGATATGCAAACCTATTACTTTGAAATCTGAATFGAATTA

**yo\_StAcrIIA5**

ATGGCTTATGGTAAATCTAGATATAATTCCTTATAGAAAAAGATCTTTTAAATAGATCTAATAAGCAAAG  
AAGAGAGTACGCTCAGGAGATGGACAGGTTGGAGAAGGCTTTTCGAGA ACTTGGACGGTTGGTACTTG  
TCTTCTATGAAAGATTCTGCTTATAAAGATTTTGGTAAATATGAAATTAGATTGTCTAATCATTCTGC  
TGATAATAAATATCATGATTTGGAAAATGGTAGATTAATTGTTAATATTAAGCTTCTAAATTTGAATT  
TTGTTGATATTATTGAAAATAAATTGGATAAAAATTATTGAAAAAATTGATAAATTTGGATTTGGATAAA  
TACAGATTTATTAACGCTACTAATTTGGAACATGATATTAATGTTATTATAAAGGTTTCAAACCTAAA  
AAAGAAGTTATTTAA

## Terminators

### SUP4t

TTTTTTTGTTTTTTATGTCT

### RPR1t

TTCTCGAGCCATATCCAACCTCCAATTTAATCTTTCTTTTTTAATTTTCACTTATTTGCGATACAGAA  
AGAAAAAAGCGATAGTAACTATTGAATTTTGTGGATTGGTTAGATTAGATATGGTTTCTCTTTA  
TATTTACATGCTAAAAATGGGCTACACCAGAGATACATAATTAGATATATATACGCCAGTACACCTTAT  
CGGCCCAAGCCTTGTCCCAAGGCAGCGTTTTGTTCTTGAAACGCTGCCCTACACGTTGCTATGCTT  
CAAGAACTTTCTGAGCACTTCATGATGCATGTTTGTTCCTTATTGGTTAGCTTTGATGTTGTGAAGT  
CATTGACACAGTCTGTGAAACATCTTTCTACCAGATTAGAGTACAAACGCATGAAATCCTTCATTTGC  
TTTTGTTCCACTACTTTTTGGAACCTTGTGTTCTTT

### ADH1t

TTCTCGAGCCATATCCAACCTCCAATTTAATCTTTCTTTTTTAATTTTCACTTATTTGCGATACAGA  
AAGAAAAAAGCGATAGTAACTATTGAATTTTGTGGATTGGTTAGATTAGATATGGTTTCTCTT  
TATATTTACATGCTAAAAATGGGCTACACCAGAGATACATAATTAGATATATATACGCCAGTACACCT  
TATCGGCCCAAGCCTTGTCCCAAGGCAGCGTTTTGTTCTTGAAACGCTGCCCTACACGTTGCTAT  
GCTTCAAGAACTTTTCTGAGCACTTCATGATGCATGTTTGTTCCTTATTGGTTAGCTTTGATGTTGT  
GAAGTCATTGACACAGTCTGTGAAACATCTTTCTACCAGATTAGAGTACAAACGCATGAAATCCTT  
CATTTGCTTTTGTCCACTACTTTTTGGAACCTTGTGTTCTTT

### CYC1t

CATGTAATTAGTTATGTCACGCTTACATTCACGCCCTCCCCCACATCCGCTCTA  
ACCGAAAAGGAAGGAGTTAGACAACCTGAAGTCTAGGTCCCTATTTATTTTTTTA  
TAGTTATGTTAGTATTAAGAACGTTATTTATATTTCAAATTTTTCTTTTTTTCTGTA  
CAGACGCGTGACGCATGTAACATTATACTGAAAACCTTGCTTGAGAAGGTTTTG  
GGACGCTCGAAGGCTTTAATTTGCAAGCT
